# Supplementary material
Source: PubMed Central journal article supplement (PMC7857361)

**Figure Supplementary 1**

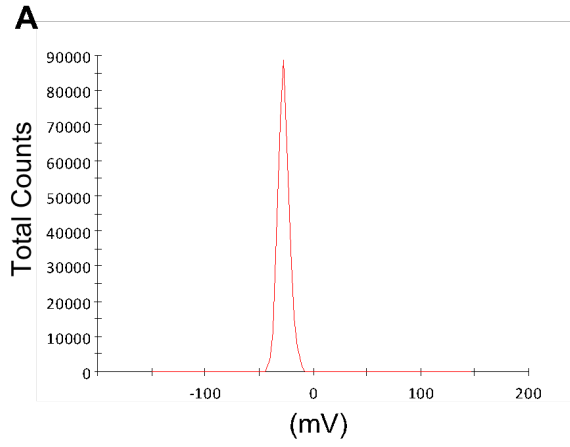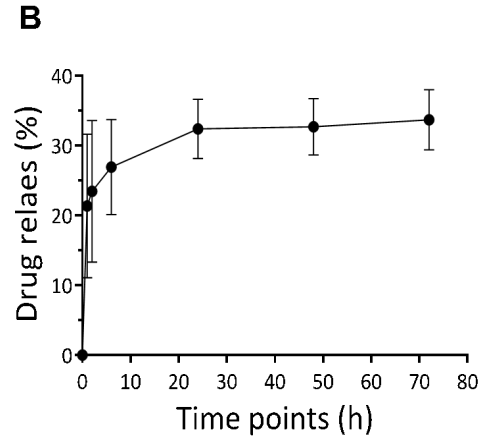

Supplement: nnm-15-2933-s2.pdf [file nnm-15-2933-s2.pdf]

## Figure Supplementary S2

A

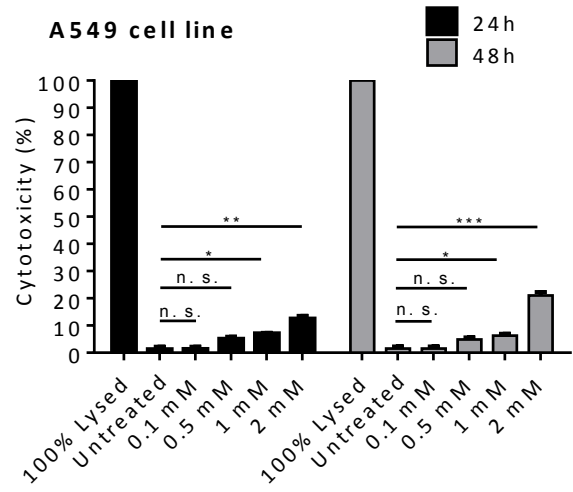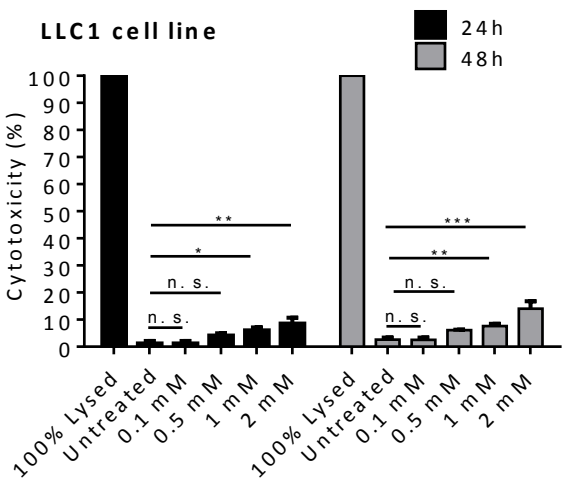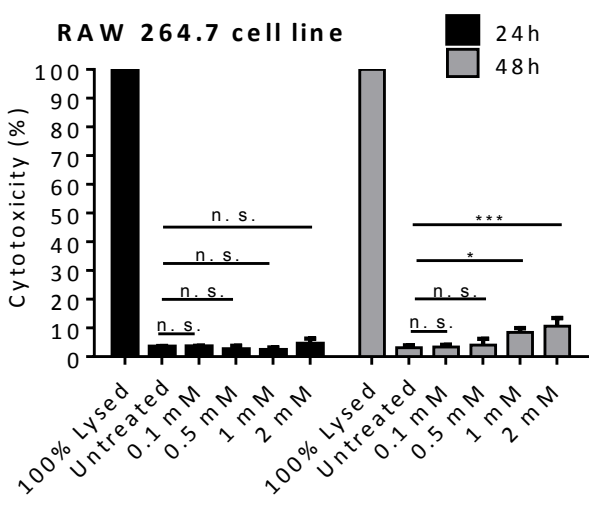

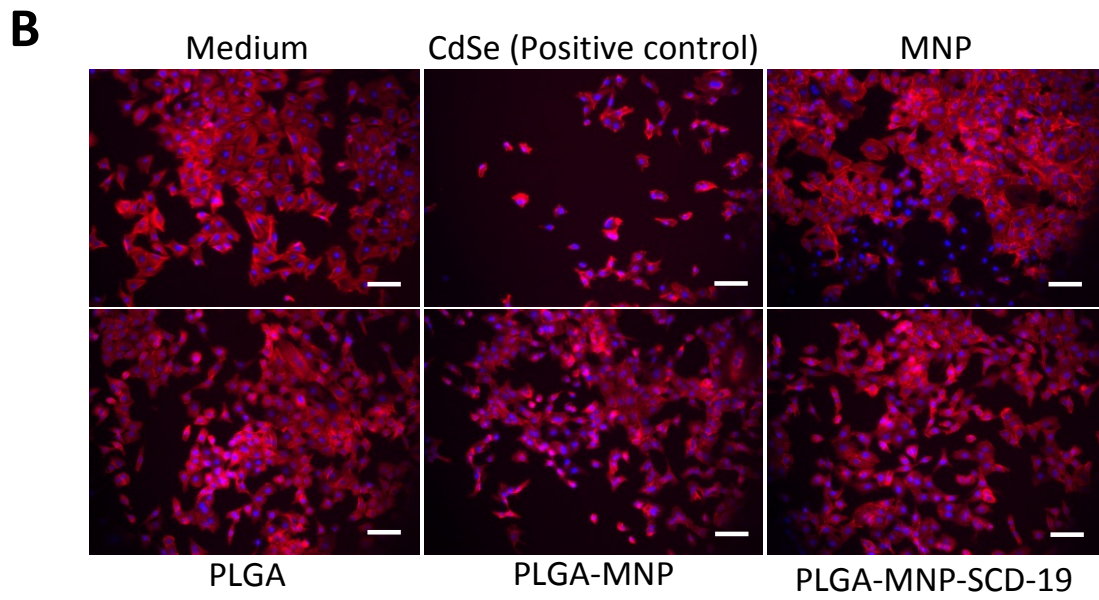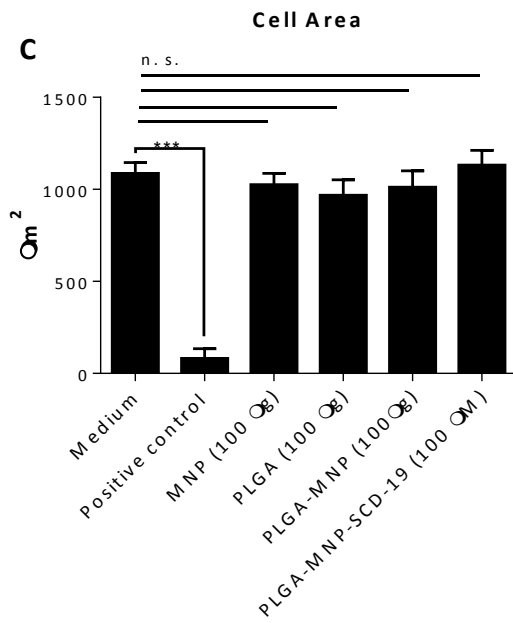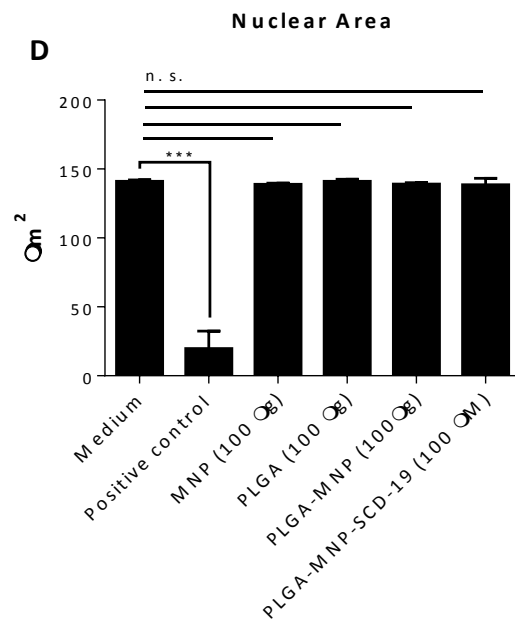

Supplement: nnm-15-2933-s3.pdf [file nnm-15-2933-s3.pdf]

**Figure Supplementary S3**

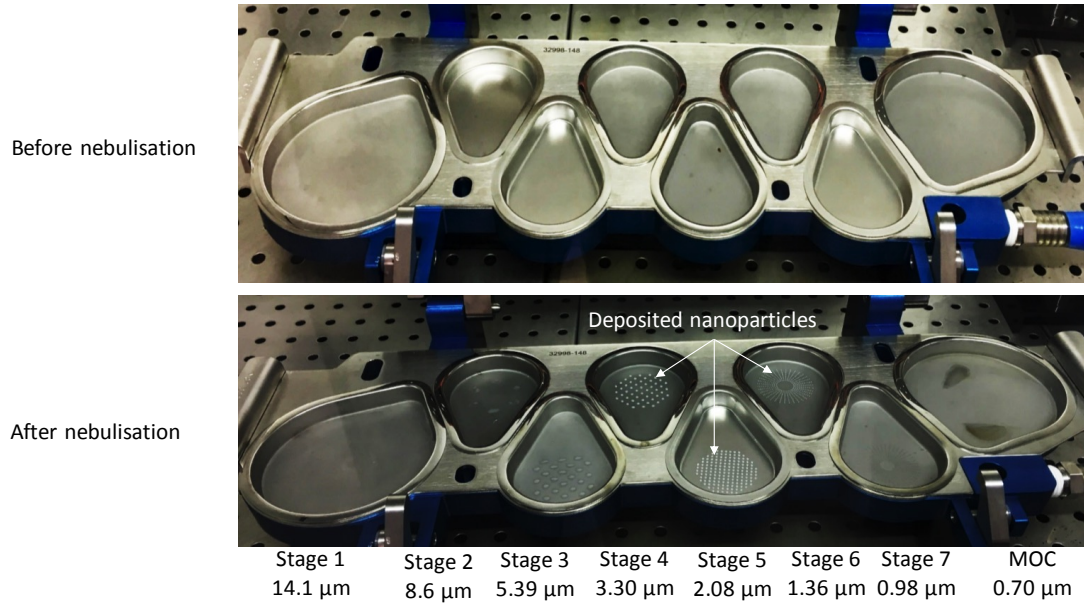

Supplement: nnm-15-2933-s4.pdf [file nnm-15-2933-s4.pdf]

Figure Supplementary S4

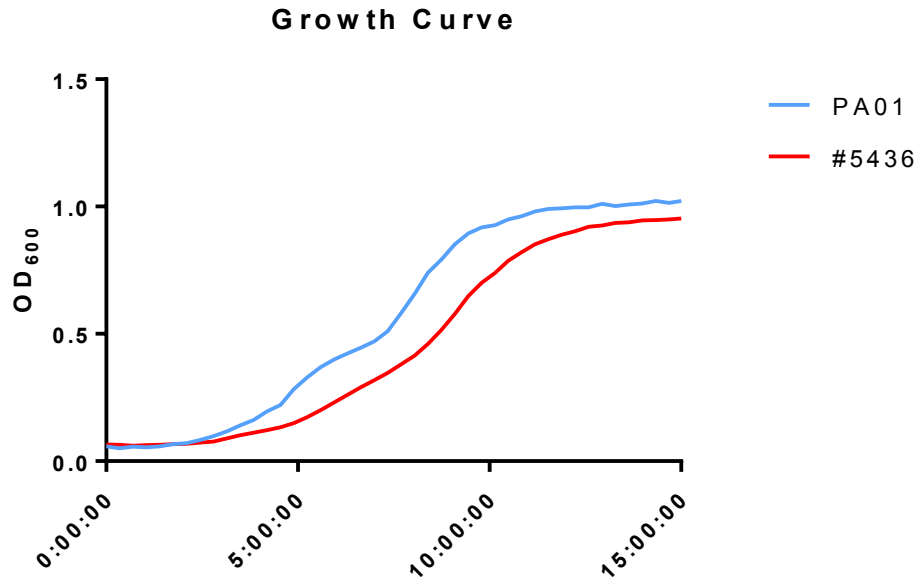

Supplement: nnm-15-2933-s5.pdf [file nnm-15-2933-s5.pdf]
